# Supplementary material for: Dance Training Improves Cytokine Secretion and Viability of Neutrophils in Diabetic Patients
Source: Hindawi journal article supplement (doi:10.1155/2019/2924818), 2019-11-20
Supplement: f1 [file 2924818.f1.pdf]

## Supplementary material

**Table A: Drug classification used for characterization and matching in the study.**

|                                              | Control<br>group | T2DM<br>group |
|----------------------------------------------|------------------|---------------|
| <hr/> <b>Medication</b>                      |                  |               |
| Participants without medication ( <i>n</i> ) | 10               | 1             |
| Insulin-dependent ( <i>n</i> )               | 0                | 6             |
| Insulin frequency ( <i>days/week</i> )       | 0                | 7             |
| Lipid-lowering agents ( <i>n</i> )           | 4                | 1             |
| Metformin family ( <i>n</i> )                | 0                | 6             |
| ACE inhibitor ( <i>n</i> )                   | 1                | 2             |
| Beta-blocker I ( <i>n</i> )                  | 3                | 3             |
| Diuretics ( <i>n</i> )                       | 1                | 1             |
| Angiotensin II ( <i>n</i> )                  | 3                | 3             |

**Note:** (1) Participants were paired in the ratios 1/1 and 1/2; (2) there was no pairing for lipid-lowering agents [reason: biochemical control was carried out by lipid analysis – Table 2]; (3) Data are represented as the mean  $\pm$  SE of at least 10 participants per group. Abbreviations: angiotensin-converting enzyme, ACE.
